# Supplementary material for: Letrozole Potentiates Mitochondrial and Dendritic Spine Impairments Induced byβAmyloid
Source: Hindawi journal article supplement (doi:10.1155/2013/538979), 2013-01-01
Supplement: f1 [file 538979.f1.pdf]

## Supplementary information:

*Table 1: Dendritic spine density after 24 or 72 hours of control and letrozole-treated cultures*

| Spine subtype | Spine density (spine/ $\mu\text{m}$ ) |                  |                  |                  |
|---------------|---------------------------------------|------------------|------------------|------------------|
|               | 24 hours                              |                  | 72 hours         |                  |
|               | control                               | letrozole        | control          | letrozole        |
| Stubby        | $0.43 \pm 0.029$                      | $0.26 \pm 0.018$ | $0.42 \pm 0.021$ | $0.23 \pm 0.019$ |
| Mushroom      | $0.72 \pm 0.033$                      | $0.38 \pm 0.032$ | $0.59 \pm 0.033$ | $0.29 \pm 0.026$ |
| Thin          | $0.73 \pm 0.055$                      | $0.35 \pm 0.055$ | $0.72 \pm 0.049$ | $0.26 \pm 0.054$ |
| Total         | $1.88 \pm 0.10$                       | $0.99 \pm 0.084$ | $1.73 \pm 0.073$ | $0.78 \pm 0.075$ |

The data used to generate the contents of this table was also used for statistical analysis. Statistical analysis was done using two sample Student's *t*-test as described in the "Materials and Method" section. The calculated p-values are displayed and incorporated into the main text in the "Results" section. Data presented here correspond to Figure 2B and C.

*Table 2: Dendritic spine density after 24 or 72 hours of control, letrozole,  $A\beta$ , or letrozole+ $A\beta$ -treated cultures.*

| Spine subtype | Spine density (spine/ $\mu\text{m}$ ) |                  |                  |                               |                  |                  |                  |                               |
|---------------|---------------------------------------|------------------|------------------|-------------------------------|------------------|------------------|------------------|-------------------------------|
|               | 24 hours                              |                  |                  |                               | 72 hours         |                  |                  |                               |
|               | control                               | letrozole        | $A\beta_{1-42}$  | letrozole+<br>$A\beta_{1-42}$ | control          | letrozole        | $A\beta_{1-42}$  | letrozole+<br>$A\beta_{1-42}$ |
| Stubby        | $0.43 \pm 0.029$                      | $0.26 \pm 0.018$ | $0.37 \pm 0.025$ | $0.28 \pm 0.022$              | $0.42 \pm 0.021$ | $0.23 \pm 0.019$ | $0.36 \pm 0.029$ | $0.29 \pm 0.028$              |
| Mushroom      | $0.72 \pm 0.033$                      | $0.38 \pm 0.032$ | $0.35 \pm 0.031$ | $0.40 \pm 0.022$              | $0.59 \pm 0.033$ | $0.29 \pm 0.026$ | $0.34 \pm 0.020$ | $0.23 \pm 0.029$              |
| Thin          | $0.73 \pm 0.055$                      | $0.35 \pm 0.055$ | $0.45 \pm 0.063$ | $0.42 \pm 0.032$              | $0.72 \pm 0.049$ | $0.26 \pm 0.054$ | $0.33 \pm 0.027$ | $0.20 \pm 0.030$              |
| Total         | $1.88 \pm 0.10$                       | $0.99 \pm 0.084$ | $1.17 \pm 0.084$ | $1.10 \pm 0.047$              | $1.73 \pm 0.073$ | $0.78 \pm 0.075$ | $1.02 \pm 0.038$ | $0.72 \pm 0.056$              |

The data used to generate the contents of this table was also used for statistical analysis. Statistical analysis was done using Two-tailed, One-way ANOVA followed by Tukey's multiple comparison test as described in the "Materials and Method" section. The calculated p-values are displayed and incorporated into the main text in the "Results" section. Data presented here correspond to Figure 4.

*Table 3: Immunostaining punta density after 24 or 72 hours of control, letrozole,  $A\beta$ , or letrozole+-treated cultures*

| Synaptic protein | Spine density (spine/ $\mu\text{m}$ ) |                   |                  |                               |                  |                  |                  |                               |
|------------------|---------------------------------------|-------------------|------------------|-------------------------------|------------------|------------------|------------------|-------------------------------|
|                  | 24 hours                              |                   |                  |                               | 72 hours         |                  |                  |                               |
|                  | control                               | letrozole         | $A\beta_{1-42}$  | letrozole+<br>$A\beta_{1-42}$ | control          | letrozole        | $A\beta_{1-42}$  | letrozole+<br>$A\beta_{1-42}$ |
| Synaptopodin     | $0.35 \pm 0.020$                      | $0.17 \pm 0.0096$ | $0.22 \pm 0.016$ | $0.19 \pm 0.013$              | $0.41 \pm 0.028$ | $0.14 \pm 0.013$ | $0.26 \pm 0.022$ | $0.092 \pm 0.015$             |
| Synaptophysin    | $1.06 \pm 0.090$                      | $0.64 \pm 0.035$  | $0.84 \pm 0.050$ | $0.65 \pm 0.043$              | $0.94 \pm 0.067$ | $0.37 \pm 0.025$ | $0.53 \pm 0.049$ | $0.31 \pm 0.026$              |

The data used to generate the contents of this table was also used for statistical analysis. Statistical analysis was done using Two-tailed, One-way ANOVA followed by Tukey's multiple comparison test as described in the "Materials and Method" section. The calculated p-values are displayed and incorporated into the main text in the "Results" section. Data presented here correspond to Figure 5.

Table 4: Dendritic spine density after 24 or 72 hours of estradiol, letrozole, A $\beta$ , or letrozole+A $\beta$ -treated cultures.

|               | Spine density (spine/ $\mu$ m) |                         |                                |                                              |                  |                         |                                |                                              |
|---------------|--------------------------------|-------------------------|--------------------------------|----------------------------------------------|------------------|-------------------------|--------------------------------|----------------------------------------------|
| Spine subtype | 24 hours                       |                         |                                |                                              | 72 hours         |                         |                                |                                              |
|               | estradiol                      | estradiol+<br>letrozole | estradiol+<br>A $\beta_{1-42}$ | estradiol+<br>letrozole+<br>A $\beta_{1-42}$ | estradiol        | estradiol+<br>letrozole | estradiol+<br>A $\beta_{1-42}$ | estradiol+<br>letrozole+<br>A $\beta_{1-42}$ |
| Stubby        | 0.36 $\pm$ 0.022               | 0.37 $\pm$ 0.026        | 0.39 $\pm$ 0.036               | 0.40 $\pm$ 0.030                             | 0.40 $\pm$ 0.027 | 0.40 $\pm$ 0.020        | 0.43 $\pm$ 0.024               | 0.42 $\pm$ 0.021                             |
| Mushroom      | 0.64 $\pm$ 0.030               | 0.66 $\pm$ 0.027        | 0.63 $\pm$ 0.038               | 0.74 $\pm$ 0.027                             | 0.62 $\pm$ 0.039 | 0.55 $\pm$ 0.035        | 0.53 $\pm$ 0.032               | 0.65 $\pm$ 0.029                             |
| Thin          | 0.66 $\pm$ 0.067               | 0.75 $\pm$ 0.040        | 0.69 $\pm$ 0.054               | 0.83 $\pm$ 0.035                             | 0.67 $\pm$ 0.033 | 0.65 $\pm$ 0.044        | 0.75 $\pm$ 0.031               | 0.73 $\pm$ 0.042                             |
| Total         | 1.66 $\pm$ 0.094               | 1.78 $\pm$ 0.059        | 1.71 $\pm$ 0.089               | 1.78 $\pm$ 0.065                             | 1.68 $\pm$ 0.050 | 1.60 $\pm$ 0.075        | 1.70 $\pm$ 0.051               | 1.78 $\pm$ 0.061                             |

The data used to generate the contents of this table was also used for statistical analysis. Statistical analysis was done using Two-tailed, One-way ANOVA followed by Tukey's multiple comparison test as described in the "Materials and Method" section. The calculated p-values are displayed and incorporated into the main text in the "Results" section. Data presented here correspond to SI Figure 1.



*Figure 1: Estradiol co-treatment prevents dendritic spine loss caused by letrozole and/or A $\beta$ <sub>1-42</sub>.*

**A**, 3D-reconstructions of dendrites from sister-cultures that were treated with either estradiol (100 nM), estradiol (100 nM) + A $\beta$  (1  $\mu$ M), letrozole (1  $\mu$ M) + estradiol (100 nM), or A $\beta$  (1  $\mu$ M) +letrozole (1  $\mu$ M) +estradiol (100 nM) for 72 hours. Scale bar, 2  $\mu$ m. **B**, Quantification of the spine subtype densities following treatments. There is a significant decrease in the total dendritic spine densities for A $\beta$ <sub>1-42</sub>, letrozole, and Letrozole+A $\beta$ <sub>1-42</sub>-treated cultures compared to control and cultures treated in the presence of estradiol after 24 hours. Estradiol prevented the dendritic spine loss caused by A $\beta$ <sub>1-42</sub>, letrozole, and letrozole+A $\beta$ <sub>1-42</sub> at both 24 and 72 hours. 24 hours Control,  $n$  = total dendritic segment lengths of 441  $\mu$ m from 10 cell in 4 cultures; estradiol,  $n$  = 625  $\mu$ m of dendrite from 12 cell in 5 cultures; estradiol+A $\beta$ <sub>1-42</sub>,  $n$  = 725  $\mu$ m of dendrite from 13 cell in 4 cultures; estradiol+letrozole,  $n$  = 862  $\mu$ m of dendrite from 10 cell in 6 cultures; estradiol+letrozole+A $\beta$ <sub>1-42</sub>,  $n$  = 645  $\mu$ m of dendrite from 11 cell in 5 cultures. 72 hours: Control,  $n$  = 500  $\mu$ m of dendrite from 12 cell in 4 cultures; estradiol,  $n$  = 710  $\mu$ m of dendrite from 10 cell in 5 cultures; estradiol+A $\beta$ <sub>1-42</sub>,  $n$  = 1016  $\mu$ m of dendrite from 14 cell in 5 cultures; estradiol+letrozole,  $n$  = 688  $\mu$ m of dendrite from 12 cell in 6 cultures; estradiol+letrozole+A $\beta$ <sub>1-42</sub>,  $n$  = 859  $\mu$ m of dendrite from 10 cell in 4 cultures.
